# Supplementary material for: 'Racial' differences in genetic effects for complex diseases
Source: Springer Nature journal article supplement (doi:10.1038/ng1474), 2004-11-14
Supplement: ng1474-S4.pdf [file ng1474-S4.pdf]

### Supplementary Table 3

Pair-wise comparisons for control frequencies

| ID* | z-score           |                  |                                |                      |                                |                             |
|-----|-------------------|------------------|--------------------------------|----------------------|--------------------------------|-----------------------------|
|     | Euro vs. E. Asian | Euro vs. African | Euro vs. Other                 | E. Asian vs. African | E. Asian vs. Other             | African vs. Other           |
| 1   |                   | 0.725            |                                |                      |                                |                             |
| 2   | 0.825             | 8.939            |                                | 7.509                |                                |                             |
| 3   | -0.917            | 1.036            |                                | 3.629                |                                |                             |
| 4   | -2.915            | -2.347           |                                | 1.426                |                                |                             |
| 5   | 2.191             | 0.769            |                                | -1.113               |                                |                             |
| 6   | 0.995             |                  |                                |                      |                                |                             |
| 7   | -0.584            | 0.024            |                                | 0.416                |                                |                             |
| 8   | 4.317             |                  |                                |                      |                                |                             |
| 9   | -6.383            |                  |                                |                      |                                |                             |
| 10  |                   |                  | 0.839 (Turk)                   |                      |                                |                             |
| 11  |                   |                  | 0.478 (Turk)                   |                      |                                |                             |
| 12  | 2.361             |                  |                                |                      |                                |                             |
| 13  |                   | 2.378            |                                |                      |                                |                             |
| 14  | -0.268            | 3.607            | 0.305 (Arab)                   | 3.242                | 0.422 (Arab)                   | -2.481 (Arab)               |
| 15  | -0.780            | -1.640           |                                | -0.591               |                                |                             |
| 16  | -3.088            |                  |                                |                      |                                |                             |
| 17  | -0.892            | -0.169           |                                | 0.640                |                                |                             |
| 18  | -16.287           |                  |                                |                      |                                |                             |
| 19  | 5.632             | 0.099            |                                | -4.566               |                                |                             |
| 20  | -2.048            | 2.542            |                                | 3.581                |                                |                             |
| 21  | 3.811             | 1.183            |                                | -2.499               |                                |                             |
| 22  |                   |                  | -1.081 (J)                     |                      |                                |                             |
| 23  | -0.494            | 4.765            | 6.462 (J)                      | 3.518                | 4.470 (J)                      | 1.833 (J)                   |
| 24  | -15.533           | -17.086          |                                | -1.464               |                                |                             |
| 25  | -7.651            |                  |                                |                      |                                |                             |
| 26  | 1.781             | 4.485            |                                | 3.116                |                                |                             |
| 27  |                   |                  | 0.755 (J)<br>2.500 (Turk)      |                      |                                |                             |
| 28  |                   | 1.942            |                                |                      |                                |                             |
| 29  | 1.146             |                  |                                |                      |                                |                             |
| 30  | -2.273            | 0.316            | -0.531 (J)<br>1.221 (Hindu)    | 1.146                | 0.112 (J)<br>1.627 (Hindu)     | -0.624 (J)<br>0.970 (Hindu) |
| 31  | -3.772            |                  | -15.346 (N. Indian)            |                      | -12.07 (N. Indian)             |                             |
| 32  |                   |                  | -0.079 (J)                     |                      |                                |                             |
| 33  |                   |                  | 0.144 (J)                      |                      |                                |                             |
| 34  | 0.854             | -0.509           |                                | -0.786               |                                |                             |
| 35  | -2.386            |                  |                                |                      |                                |                             |
| 36  | -3.148            |                  | -9.301 (Turk)<br>0.678 (Hindu) |                      | -2.233 (Turk)<br>2.116 (Hindu) |                             |
| 37  | 1.249             |                  | -1.605 (Hindu)                 |                      | -2.707 (Hindu)                 |                             |
| 38  | -3.527            | 2.041            | 1.510 (J)                      | 4.200                | 3.279 (J)                      | 0.037 (J)                   |

|           |        |        |               |        |                 |               |
|-----------|--------|--------|---------------|--------|-----------------|---------------|
|           |        |        | -0.172 (Turk) |        | 1.512 (Turk)    | -1.277 (Turk) |
| <b>39</b> | 2.130  | 5.465  | -0.334 (J)    | 1.957  | -2.167 (J)      | -5.105 (J)    |
|           |        |        | 1.060 (Turk)  |        | -1.012 (Turk)   | -3.332 (Turk) |
| <b>40</b> | -3.492 | -3.577 | -4.324        | -1.658 | -2.216 (Hawaii) | -0.333        |
|           |        |        | (Hawaii)      |        |                 | (Hawaii)      |
| <b>41</b> | 1.497  | 1.076  | 5.194 (Hindu) | 0.709  | 4.170 (Hindu)   | 1.269 (Hindu) |
| <b>42</b> | -6.773 | 2.472  | -1.020        | 5.527  | 3.562 (Hindu)   | -2.754        |
|           |        |        | (Hindu)       |        |                 | (Hindu)       |
| <b>43</b> | -1.442 |        | -1.369        |        | 0.673 (Hindu)   |               |
|           |        |        | (Hindu)       |        |                 |               |

\*ID corresponds to **Table 1** in the main paper.
